# Supplementary material
Source: PubMed Central journal article supplement (PMC2967029)
Supplement: NIHMS239696-supplement-supplement_1.pdf [file NIHMS239696-supplement-supplement_1.pdf]

## Supplemental Figure I

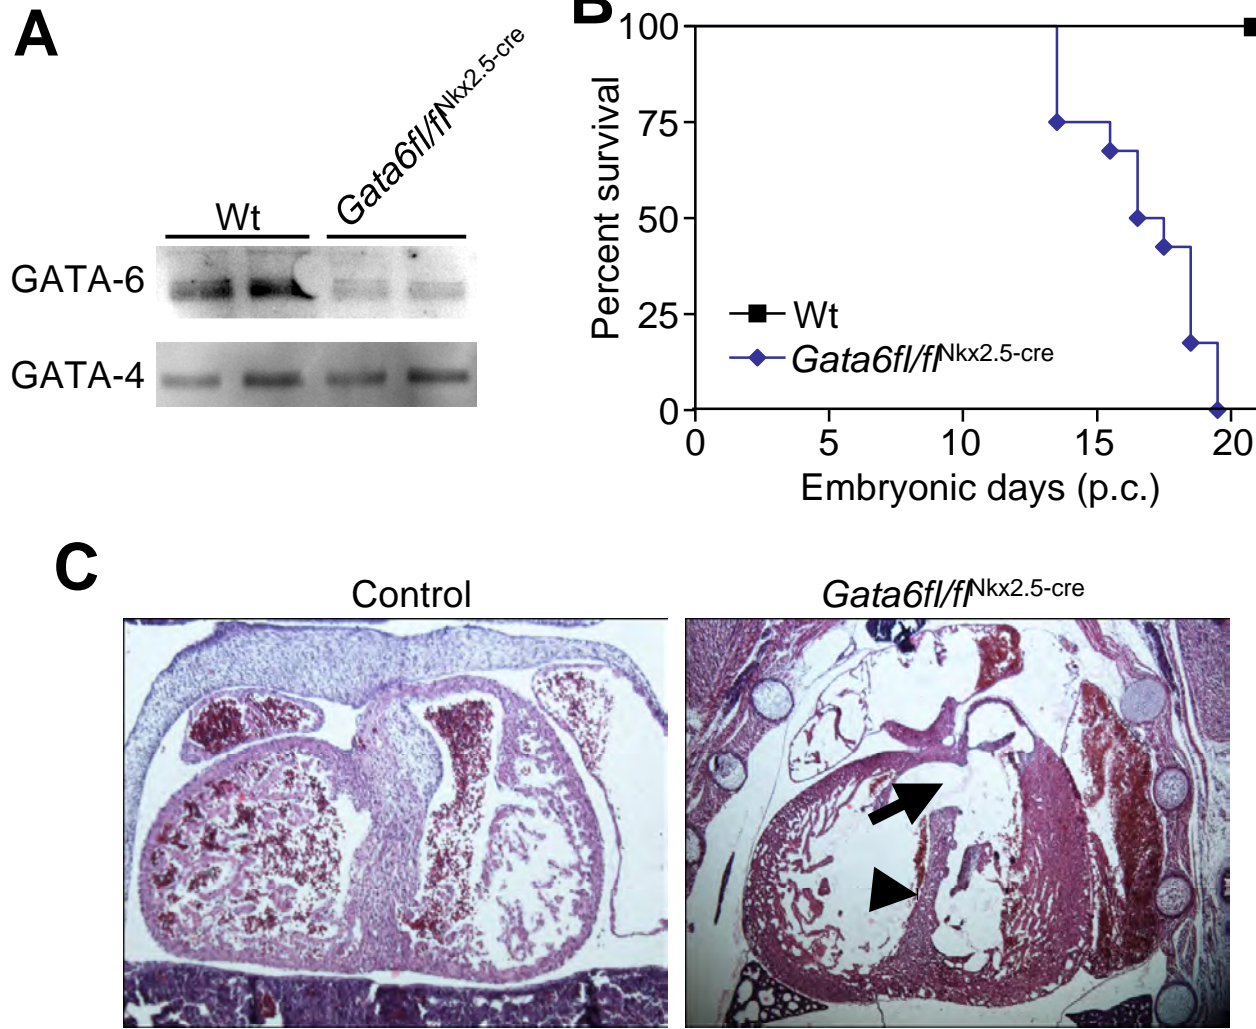

**Supplemental Figure I.** Developmental phenotype of *Gata6fl/fl<sup>Nkx2.5-cre</sup>* mice. A. Western blot for GATA-6 and GATA-4 from cardiac protein lysates from embryos at day 14.5. B. Survival curve of wildtype and *Gata6*-deleted embryos. Time is indicated in embryonic developmental day after conception. C. Immunohistochemistry of control and *Gata6fl/fl<sup>Nkx2.5-cre</sup>* embryos at E16.5 showing ventricular septum defect (arrow) and thinned (arrowhead) septum in *Gata6*-deleted embryos.

## Supplemental Figure II

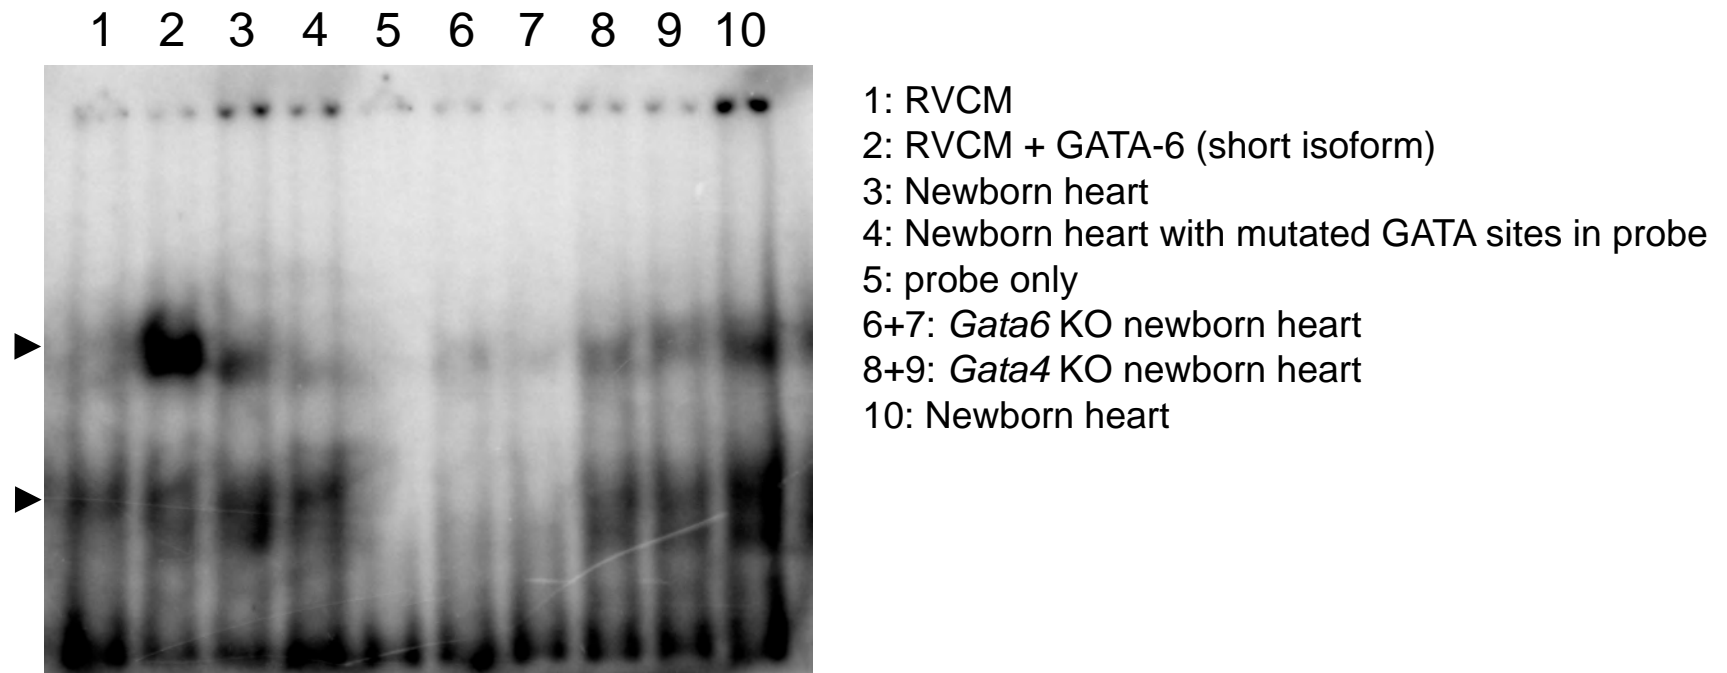

**Supplemental Figure II.** Gel shift for total GATA DNA binding activity in the adult heart of *Gata6* and *Gata4* heart-specific KO mice. The data show that loss of GATA-6 from the heart reduces total GATA DNA binding activity better than loss of GATA-4. Control samples are from newborn hearts and rat ventricular myocytes with and without infection with AdGATA-6 adenovirus as a migration marker of GATA-6 on the gel shift. A probe only negative control is also shown where the GATA binding sites are mutated. Arrows indicate specific GATA binding activity.

### Supplemental Figure III

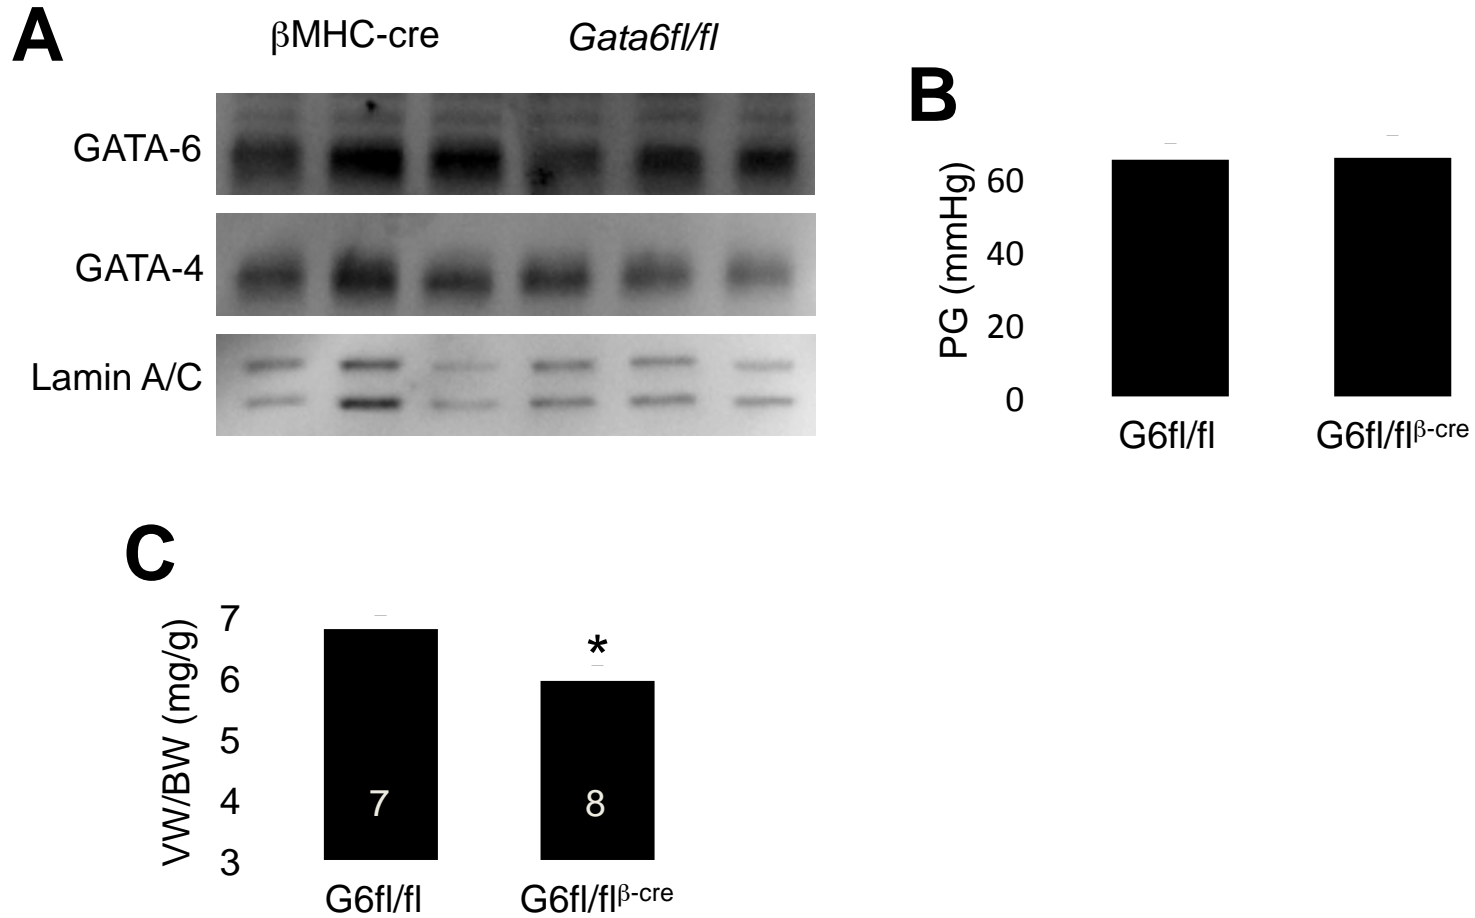

**Supplemental Figure III.** A, Western blot for GATA-6 and GATA-4 of nuclear extracts from  $\beta$ MHC-Cre and *Gata6fl/fl* shows equal GATA-6 expression (i.e. the loxP allele is not hypomorphic). B, Doppler echocardiography 1 day after TAC surgery to measure pressure gradients across the constriction shows equal gradients between *Gata6fl/fl* and *Gata6fl/fl* $\beta$ <sup>MHC-Cre</sup>. C, 1 week after induction of pressure overload in the same mice shown in B, *Gata6fl/fl* mice again show significantly higher ventricular/body weight ratio's than *Gata6fl/fl* $\beta$ <sup>MHC-Cre</sup> mice (\* p<0.05).

## Supplemental Tables

**Supplemental table I.** Assessment of cardiac dimensions and function of 1 year-old mice of indicated genotypes, measured by M-mode echocardiography.

| Genotype            | Number of mice | IVS (mm)  | LVPW (mm) | LVED (mm) | LVES (mm) | FS (%)   |
|---------------------|----------------|-----------|-----------|-----------|-----------|----------|
| <b>β-Cre</b>        | 13             | 0.94±0.03 | 1.00±0.02 | 4.08±0.13 | 2.76±0.15 | 32.7±1.7 |
| <b>G6fl/fl</b>      | 17             | 0.95±0.03 | 1.01±0.02 | 3.93±0.09 | 2.63±0.08 | 33.3±0.8 |
| <b>G6fl/flβ-Cre</b> | 8              | 0.93±0.05 | 0.96±0.03 | 4.21±0.12 | 2.86±0.13 | 32.2±1.5 |

Abbreviations: IVS, interventricular septum; LVPW, left ventricular posterior wall; LVED, left ventricular end diastolic dimension; LVES, left ventricular end systolic dimension; FS, fractional shortening.

**Supplemental table II.** Assessment of cardiac dimensions and function up to 6 weeks after TAC, measured by M-Mode echocardiography, \*p<0.05 G6fl/flβ-Cre vs β-Cre at the same time point, †p<0.05 G6fl/flβ-Cre vs G6fl/fl, ‡p<0.05 G6fl/fl vs β-Cre.

| Genotype                      | Week | IVS (mm)   | LVPW (mm)   | LVED (mm)  | LVES (mm)   | FS (%)     |
|-------------------------------|------|------------|-------------|------------|-------------|------------|
| <b>β-Cre</b><br>(N=16)        | 0    | 0.79±0.02  | 0.92±0.02   | 4.02±0.08  | 2.62±0.07   | 33.1±0.7   |
|                               | 2    | 1.14±0.04  | 1.28±0.04   | 3.41±0.10  | 2.26±0.08   | 33.9±0.9   |
|                               | 4    | 1.15±0.05  | 1.22±0.04   | 3.78±0.08  | 2.67±0.08   | 29.4±1.3   |
|                               | 6    | 1.18±0.05  | 1.25±0.04   | 3.81±0.10  | 2.72±0.08   | 28.5±1.0   |
| <b>G6fl/fl</b><br>(N=9)       | 0    | 0.83±0.04  | 0.96±0.05   | 3.55±0.08‡ | 2.25±0.07   | 37.3±1.0   |
|                               | 2    | 1.01±0.06  | 1.12±0.06‡  | 3.64±0.13  | 2.49±0.08   | 31.8±1.7   |
|                               | 4    | 0.98±0.05‡ | 1.19±0.06   | 3.86±0.13  | 2.78±0.14   | 28.2±1.2   |
|                               | 6    | 1.01±0.07‡ | 1.21±0.06   | 3.90±0.14  | 2.87±0.11   | 26.3±1.5   |
| <b>G6fl/flβ-Cre</b><br>(N=13) | 0    | 0.73±0.02  | 0.97±0.03   | 4.04±0.08† | 2.68±0.08   | 33.5±0.8   |
|                               | 2    | 0.86±0.03* | 1.07±0.04*  | 3.86±0.13* | 2.91±0.16*  | 25.3±1.7*† |
|                               | 4    | 0.87±0.04* | 1.01±0.04*† | 4.26±0.16* | 3.20±0.31*  | 19.8±1.1*† |
|                               | 6    | 0.85±0.05* | 1.04±0.04*† | 4.37±0.18* | 3.54±0.19*† | 19.4±1.4*† |

Abbreviations: IVS, intraventricular septum; LVPW, left ventricular posterior wall; LVED, left ventricular end diastolic dimension; LVES, left ventricular end systolic dimension; FS, fractional shortening.

**Supplemental table III.** Assessment of cardiac dimensions and function of control and GATA-6 overexpressing mice after Sham and TAC surgery, measured by M-mode echocardiography.

| <b>Genotype</b> | <b>treatment</b> | <b>Number of mice</b> | <b>IVS (mm)</b> | <b>LVPW (mm)</b> | <b>LVED (mm)</b> | <b>LVES (mm)</b> | <b>FS (%)</b> |
|-----------------|------------------|-----------------------|-----------------|------------------|------------------|------------------|---------------|
| <b>TTA</b>      | Sham             | 11                    | 0.85±0.03       | 0.92±0.03        | 3.63±0.09        | 2.30±0.10        | 36.9±1.5      |
|                 | TAC              | 14                    | 1.06±0.03       | 1.07±0.04        | 3.50±0.05        | 2.22±0.06        | 36.6±1.1      |
| <b>Low</b>      | Sham             | 8                     | 0.89±0.02       | 0.97±0.03        | 3.69±0.07        | 1.97±0.23        | 40.0±0.9      |
|                 | TAC              | 9                     | 1.13±0.04       | 1.07±0.03        | 3.45±0.07        | 2.13±0.08        | 38.4±1.2      |
| <b>Medium</b>   | Sham             | 6                     | 0.90±0.04       | 0.97±0.05        | 3.53±0.22        | 2.24±0.12        | 36.5±2.1      |
|                 | TAC              | 13                    | 1.05±0.04       | 1.15±0.04        | 3.38±0.12        | 2.16±0.11        | 36.7±1.4      |
| <b>High</b>     | Sham             | 7                     | 0.92±0.04       | 1.07±0.05        | 3.46±0.12        | 1.92±0.07        | 44.6±0.8      |
|                 | TAC              | 12                    | 1.10±0.04       | 1.15±0.04        | 3.57±0.13        | 2.18±0.13        | 39.0±1.7      |

Abbreviations: IVS, intraventricular septum; LVPW, left ventricular posterior wall; LVED, left ventricular end diastolic dimension; LVES, left ventricular end systolic dimension; FS, fractional shortening.
